# Supplementary material for: Bismuth-catalyzed and doped p-type ZnSe nanowires and their temperature-dependent charge transport properties
Source: Royal Society of Chemistry journal article supplement (doi:10.1039/c5tc02853a), 2015-12-15
Supplement: c5tc02853a1.pdf [file c5tc02853a1.pdf]

## Supporting Information

**Table S1.** Comparison of activation energies of p-type ZnSe doped by different dopants.

|                                                                           | Activation Energy<br>(meV) | References                                                |
|---------------------------------------------------------------------------|----------------------------|-----------------------------------------------------------|
| Our work                                                                  | 54.3                       | -                                                         |
| p-type ZnSe layers<br>by using Li <sub>3</sub> N as the p-type<br>dopants | 80                         | Applied Physics Letters<br>52, 1988, 57-59.               |
| P-doped ZnSe Nanowires                                                    | 97                         | Journal of Materials Chemistry,<br>2012, 22, 22873-22830. |
| As-doped ZnSe                                                             | -                          |                                                           |
| Sb-doped p-type ZnSe film                                                 | 600                        | Journal of Crystal Growth<br>214/215 ,2000, 529-532       |
| P-doped p-type ZnSe<br>epitaxial layer                                    | 85 ± 1                     | PHYSICAL REVIEW B<br>61, 2000,15789-15796.                |
